# Supplementary material for: Phenolic Compounds Inhibit 3T3-L1 Adipogenesis Depending on the Stage of Differentiation and Their Binding Affinity to PPARγ
Source: PubMed Central journal article supplement (PMC6470710; doi:10.3390/molecules24061045), 2019-03-16
Supplement: molecules-24-01045-s001.pdf [file molecules-24-01045-s001.pdf]

## Supplementary Tables

**Table S1.** TaqMan gene expression assays used for the quantitative real time PCR analysis.

| GENE          | DESCRIPTION                                         | Gene Expression Assay reference |
|---------------|-----------------------------------------------------|---------------------------------|
| <i>Pparg</i>  | Peroxisome proliferator activated receptor gamma    | Mm00440940_m1*                  |
| <i>Cebpa</i>  | CCAAT/enhancer binding protein (C/EBP), alpha       | Mm00514283_s1*                  |
| <i>Fasn</i>   | Fatty acid synthase                                 | Mm00662319_m1*                  |
| <i>Scd1</i>   | Stearoyl-Coenzyme A desaturase 1                    | Mm00772290_m1*                  |
| <i>Lpl</i>    | Lipoprotein lipase                                  | Mm00434764_m1*                  |
| <i>Tbp</i>    | TATA box binding protein. Housekeeping gene control | Mm00446973_m1*                  |
| <i>Adipoq</i> | Adiponectin                                         | Mm.PT.58.9719546 **             |
| <i>Plin1</i>  | Perilipin 1                                         | Mm.PT.58.10000337 **            |
| <i>Fabp4</i>  | Fatty acid binding protein 4, adipocyte             | Mm.PT.58.43866459**             |

\* TaqMan® Gene Expression Assays (Thermo Fisher Scientific).

\*\* PrimeTime qPCR Probe Assays (Integrated DNA Technologies, Inc).

**Table S2.** Quantification of the toxicity induced by phenolic compounds in 3T3-L1 preadipocytes. Results are expressed as the mean cell viability in percentage ( $\pm$ SD) relative to DMSO-treated control cells. Shadowed are the concentrations at which a significant decrease in cell viability is observed.

|                         | 1 $\mu$ M           | 10 $\mu$ M           | 50 $\mu$ M            | 100 $\mu$ M          | 250 $\mu$ M           |
|-------------------------|---------------------|----------------------|-----------------------|----------------------|-----------------------|
| Hesperidin              | 102.89 $\pm$ 1.59   | 95.70 $\pm$ 4.59     | 92.55 $\pm$ 9.84      | 102.09 $\pm$ 1.95    | 54.02 $\pm$ 9.34 ***  |
| Naringin                | 89.00 $\pm$ 17.40   | 59.58 $\pm$ 4.65 **  | 55.19 $\pm$ 11.73 **  | 64.13 $\pm$ 10.05 ** | 39.25 $\pm$ 25.57 *** |
| Apigenin                | 104.39 $\pm$ 5.57   | 104.32 $\pm$ 2.37    | 102.66 $\pm$ 1.84     | 86.67 $\pm$ 7.54 **  | 33.28 $\pm$ 2.74 ***  |
| Luteolin                | 78.41 $\pm$ 19.61 * | 68.62 $\pm$ 16.32 ** | 60.70 $\pm$ 15.04 **  | 32.60 $\pm$ 8.57 *** | 24.77 $\pm$ 10.02 *** |
| Myricetin               | 111.67 $\pm$ 3.91   | 104.18 $\pm$ 5.61    | 98.38 $\pm$ 13.19     | 54.92 $\pm$ 1.46 *** | 59.92 $\pm$ 10.64 *** |
| Kaempferol              | 75.64 $\pm$ 4.38 *  | 28.64 $\pm$ 5.63 *** | 48.69 $\pm$ 11.31 *** | 64.91 $\pm$ 20.57 ** | 68.38 $\pm$ 1.98 **   |
| Quercetin               | 111.33 $\pm$ 0.43   | 112.99 $\pm$ 1.07    | 118.76 $\pm$ 3.92 *   | 122.36 $\pm$ 2.42 *  | 116.21 $\pm$ 15.59    |
| Resveratrol             | 92.64 $\pm$ 10.53   | 106.55 $\pm$ 6.08    | 92.12 $\pm$ 5.42      | 64.16 $\pm$ 6.16 *** | 47.36 $\pm$ 9.64 ***  |
| Curcumin                | 93.07 $\pm$ 2.39    | 94.87 $\pm$ 1.93     | 47.82 $\pm$ 19.41 #   | 36.35 $\pm$ 3.99 *   | 37.39 $\pm$ 0.47 **   |
| <i>p</i> -Coumaric acid | 99.49 $\pm$ 1.18    | 100.27 $\pm$ 2.37    | 99.61 $\pm$ 4.18      | 101.37 $\pm$ 2.49    | 101.02 $\pm$ 5.48     |
| Ellagic acid            | 102.16 $\pm$ 4.99   | 103.65 $\pm$ 1.27    | 96.00 $\pm$ 0.1       | 99.25 $\pm$ 2.61     | 107.88 $\pm$ 2.16     |
| Ferulic acid            | 103.24 $\pm$ 5.63   | 100.27 $\pm$ 3.52    | 106.83 $\pm$ 4.18     | 101.89 $\pm$ 1.57    | 97.66 $\pm$ 3.82      |
| Gallic acid             | 102.29 $\pm$ 4.59   | 106.02 $\pm$ 4.08    | 99.82 $\pm$ 1.91      | 101.35 $\pm$ 2.49    | 104.09 $\pm$ 3.74     |
| Vanillic acid           | 95.37 $\pm$ 2.71    | 99.25 $\pm$ 4.52     | 107.18 $\pm$ 4.61 *   | 97.88 $\pm$ 7.36     | 93.55 $\pm$ 1.23      |

**Table S3.** Cohen's D effect size of the anti-adipogenic activity (quantified by Nile Red) for each phenolic compound during S1, S2 and S3 stages.

|                               | NR S1 | NR S2 | NR S3 |
|-------------------------------|-------|-------|-------|
| <b>3T3-L1 preadipocytes</b>   | 12.52 | 11.57 | 17.02 |
| <b>3T3-L1 DMSO control</b>    | 0.00  | 0.00  | 0.00  |
| <b>Hesperidin</b>             | -0.20 | 1.00  | 0.48  |
| <b>Myricetin</b>              | 1.95  | 0.32  | 1.87  |
| <b>Quercetin</b>              | 5.32  | 5.27  | 4.34  |
| <b>Apigenin</b>               | 2.44  | 0.38  | 2.57  |
| <b>Resveratrol</b>            | 3.29  | 4.34  | 1.76  |
| <b>Curcumin</b>               | 0.78  | 0.00  | 1.05  |
| <b><i>p</i>-Coumaric Acid</b> | 1.48  | 0.57  | 1.53  |
| <b>Ellagic acid</b>           | 2.34  | 2.10  | -0.50 |
| <b>Ferulic acid</b>           | 2.14  | 0.76  | -0.21 |
| <b>Galic acid</b>             | 3.16  | 0.00  | 0.66  |
| <b>Vanillic acid</b>          | 4.35  | 1.02  | -0.08 |

**Table S4.** Interactions of each phenolic compound with the specific amino acids of the PPAR $\gamma$  LBD, predicted by DockingServer (H for hydrogen, C for carbon and O for oxygen). Troglitazone and aglycones from naringin and hesperidin (naringenin and hesperetin, respectively) are shown shadowed for comparative purposes.

|              | Hydrogen bonds                                    | Polar                                                                                                   | Cation-pi                                                  | Hydrophobic                                                                                      | pi-pi                                                          | Other                                                                                                                                                                                                                                                           |
|--------------|---------------------------------------------------|---------------------------------------------------------------------------------------------------------|------------------------------------------------------------|--------------------------------------------------------------------------------------------------|----------------------------------------------------------------|-----------------------------------------------------------------------------------------------------------------------------------------------------------------------------------------------------------------------------------------------------------------|
| Troglitazone | O-LYS265 (N)[3.38]                                |                                                                                                         |                                                            | C-HIS266 (CD2) [3.51]<br>C-LEU228 (CD2) [3.74]<br>C-LEU333 (CD1) [3.89]<br>C-PHE287 (CD1) [3.75] |                                                                | O-LEU228 (CB,CD2) [3.39]<br>N-LEU228 (CD2) [3.43]<br>H-LEU228 (CD2) [2.89]<br>C-HIS266 (NE2) [3.49]<br>O-PHE287 (CD1) [3.89]<br>C-ARG288 (CG) [3.78]<br>C-GLU291 (CD,OE1,OE2) [2.85]<br>S-GLU291 (OE2) [3.62]<br>H-LEU333 (CD1) [3.84]<br>O-LEU333 (CD1) [3.76] |
| Hesperetin   |                                                   | O-GLU291 (OE1) [3.62]<br>H-GLU291 (OE1, OE2) [3.29]                                                     | H-PHE264 (CB, CD1, CG) [3.49]<br>H-HIS266 (CD2, CG) [2.87] | C-HIS266 (CD2) [3.64]<br>C-LEU333 (CD1) [3.60]<br>C-ILE341 (CB,CG2) [3.56]                       |                                                                | O-PHE264 (CB, CD1, CG) [3.65]<br>O-HIS266 (CD2) [3.35]<br>H-GLU291 (CG) [3.67]<br>O-LEU330 (CD1) [3.78]<br>O-LEU333 (CD1) [3.39]<br>H-LEU333 (CD1) [3.47]<br>O-VAL339 (CG2) [3.67]<br>H-VAL339 (CG2) [2.95]<br>O-ILE341 (CB,CG2) [3.60]                         |
| Luteolin     | O-ARG280 (CB, NH2) [3.42]<br>O-CYS285 (SG) [3.29] | O-GLU259 (OE2) [3.25]<br>H-GLU259 (OE2) [2.29]<br>H-ARG280 (CZ, NE, NH2) [3.36]<br>O-ARG288 (CB) [3.53] |                                                            | C-LEU255 (CD1) [3.80]<br>C-CYS285 (SG) [3.82]<br>C-ILE341 (CG2) [3.86]                           | C-PHE264 (CB, CD2, CG) [3.31]<br>C-HIS266 (CB, CD2, CG) [3.06] | H-LEU255 (CD1, CD2, CG) [2.94]<br>O-LEU255 (CD1, CD2) [3.37]<br>H-GLU259 (CD) [3.33]<br>C-GLU259 (OE2) [3.67]<br>O-HIS266 (CB) [3.88]<br>O-ILE281 (CG1) [3.60]<br>H-CYS285 (SG) [2.57]<br>C-ARG288 (CB) [3.87]<br>O-ILE341 (CG2) [3.50]                         |

|          |                             |                           |                           |                          |                       |                               |
|----------|-----------------------------|---------------------------|---------------------------|--------------------------|-----------------------|-------------------------------|
| Apigenin | O-TYR327 (CE1,CZ,OH) [3.06] | O-ARG288 (CB, NH2) [3.56] | H-TYR327 (CE1, CZ) [2.73] | C-CYS285 (CB, SG) [3.51] | C-TYR327 (CE1) [3.40] | C-ARG288 (CB, NE, NH2) [3.23] |
|          |                             | O-GLU291 (CE1) [3.90]     | H- HIS449 (CD2) [3.42]    | C-ILE326 (CG2) [3.32]    | C- PHE363 (CZ) [3.83] | H-GLU291 (CB) [3.29]          |
|          |                             | H-GLU291 (CE1) [3.58]     |                           | C-LEU330 (CG) [3.90]     |                       | H-ALA292 (CB) [3.82]          |
|          |                             | H-TYR327 (OH) [2.22]      |                           | C-LEU333 (CD1) [3.83]    |                       | O-LEU333 (CD1) [3.33]         |
|          |                             | O-HIS449 (NE2) [3.44]     |                           | C-MET364 (SD) [3.69]     |                       | H-LEU333 (CD1) [3.48]         |
|          |                             | H-HIS449 (NE2) [3.26]     |                           |                          |                       | O-VAL339 (CG2) [3.78]         |
|          |                             |                           |                           |                          |                       | O-PHE363 (CE1,CZ) [3.37]      |
|          |                             |                           |                           |                          |                       | O-HIS449 (CD2) [3.66]         |

**Table S4 (cont).** Interactions of each phenolic compound with the specific amino acids of the PPAR $\gamma$  LBD, predicted by DockingServer (H for hydrogen, C for carbon and O for oxygen). Troglitazone and aglycones from naringin and hesperidin (naringenin and hesperetin, respectively) are shown shadowed for comparative purposes.

|              | Hydrogen bonds | Polar                     | Cation-pi | Hydrophobic              | pi-pi | Other                          |
|--------------|----------------|---------------------------|-----------|--------------------------|-------|--------------------------------|
| Naringenin   |                | H-ARG280 (CB) [3.88]      |           | C-ILE341 (CB,CG2) [3.52] |       | H-ILE281 (CG1) [3.89]          |
|              |                | O-GLU291 (OE1,OE2) [3.51] |           |                          |       | C-ARG288 (CG) [3.78]           |
|              |                | H-GLU291 (OE1,OE2) [2.95] |           |                          |       | H-GLU291 (CD) [3.72]           |
|              |                |                           |           |                          |       | O-LEU333 (CD1) [3.76]          |
|              |                |                           |           |                          |       | H-LEU333 (CD1) [3.47]          |
| Ellagic acid |                | O-ARG288 (CB,CG) [3.58]   |           |                          |       | O-PHE264 (CD1) [3.77]          |
|              |                | O-GLU291 (CE1,CE2) [3.17] |           |                          |       | H-ILE281 (CB, CG1, CG2) [3.39] |
|              |                | H-GLU291 (CE1,CE2) [2.26] |           |                          |       | O-ILE281 (CG2) [3.39]          |
|              |                |                           |           |                          |       | O-CYS285 (SG) [3.80]           |
|              |                |                           |           |                          |       | H-CYS285 (SG) [3.04]           |
|              |                |                           |           |                          |       | C-ARG288 (CB,CG) [3.43]        |
|              |                |                           |           |                          |       | O-GLU291 (CD) [3.78]           |
|              |                |                           |           |                          |       | H-GLU291 (CD) [2.95]           |
|              |                |                           |           |                          |       | O-MET348 (CE) [3.63]           |

---

|            |                      |                       |                       |                              |
|------------|----------------------|-----------------------|-----------------------|------------------------------|
| Kaempferol | O-CYS285 (SG) [3.62] | O-ARG288 (CB, NH2)    | C-CYS285 (CB,SG)      | O-PRO227 (CB, CD, CG) [3.25] |
|            |                      | [3.49]                | [3.73]                | H-PRO227 (CB, CD, CG) [2.93] |
|            |                      | H-SER289 (OG) [3.68]  | C-LEU333 (CD1) [3.68] | H-CYS285 (CB) [3.72]         |
|            |                      | H-GLU295 (CE1,CE2)    |                       |                              |
|            |                      | [1.93]                |                       |                              |
|            |                      | O-GLU295 (OE2) [2.89] |                       | O-ARG288 (CB, NH2) [3.26]    |
|            |                      |                       |                       | O-SER289 (CB) [3.40]         |
|            |                      |                       |                       | H-SER289 (CB) [2.96]         |
|            |                      |                       |                       | O-GLU295 (CD) [3.79]         |
|            |                      |                       |                       | H-GLU295 (CD) [2.87]         |
|            |                      |                       |                       | C-GLU295 (OE2) [3.61]        |
|            |                      |                       |                       | O-LEU333 (CD1) [3.68]        |
|            |                      |                       |                       | H-LEU333 (CD1) [3.86]        |
|            |                      |                       |                       | O-ILE341 (CD1,CG1) [3.39]    |
|            |                      |                       |                       | H-ILE341 (CD1,CG1) [3.27]    |

---

**Table S4 (cont).** Interactions of each phenolic compound with the specific amino acids of the PPAR $\gamma$  LBD, predicted by DockingServer (H for hydrogen, C for carbon and O for oxygen).

|             | Hydrogen bonds              | Polar                        | Cation-pi                        | Hydrophobic                 | pi-pi                 | Other                              |
|-------------|-----------------------------|------------------------------|----------------------------------|-----------------------------|-----------------------|------------------------------------|
| Quercetin   | O-ARG280 (NE,NH2)<br>[3.40] | O-GLU259 (OE2) [3.56]        | H-PHE264 (CB) [3.61]             | C-ILE281 (CG1) [3.67]       | C-PHE264 (CD2) [3.66] | O-GLU259 (CD) [3.89]               |
|             |                             | H-GLU259 (OE2) [2.93]        | H-HIS266 (CB, CD2, CG)<br>[3.07] | C-CYS285 (SG) [3.27]        | C-HIS266 (CB) [3.78]  | H-GLU259 (CD) [3.43]               |
|             |                             | H-ARG280 (NE,NH2)<br>[3.68]  |                                  | C-ILE341 (CB,CG2)<br>[3.21] |                       | O-PHE264 (CB,CD2,CG) [3.21]        |
|             |                             |                              |                                  | C-MET348 (CE,SD)<br>[3.19]  |                       | O-HIS266 (CB) [3.61]               |
|             |                             |                              |                                  |                             |                       | C-ARG280 (CB) [3.64]               |
|             |                             |                              |                                  |                             |                       | O-CYS285 (SG) [3.43]               |
|             |                             |                              |                                  |                             |                       | H-CYS285 (SG) [3.19]               |
|             |                             |                              |                                  |                             |                       | H-ILE341 (CB) [3.61]               |
|             |                             |                              |                                  |                             |                       | O-MET348 (CE) [3.32]               |
|             |                             |                              |                                  |                             |                       | H-LEU353 (CD1,CD2) [3.75]          |
| Curcumin    |                             | O-ARG288 (CB, NH2)<br>[3.40] |                                  | C-LEU333 (CD1) [3.51]       |                       | O-LEU228 (CB) [3.41]               |
|             |                             | O-GLU343 (OE1) [3.69]        |                                  |                             |                       | O-CYS285 (SG) [3.81]               |
|             |                             |                              |                                  |                             |                       | H-CYS285 (SG) [3.39]               |
|             |                             |                              |                                  |                             |                       | C-ARG288 (CB,NE,NH2) [3.44]        |
|             |                             |                              |                                  |                             |                       | C-GLU291 (CB,CD,CG,OE2)<br>[3.23]  |
|             |                             |                              |                                  |                             |                       | C-GLN294 (CB) [3.84]               |
|             |                             |                              |                                  |                             |                       | C-GLU295 (CD,CG,OE1,OE2)<br>[3.07] |
|             |                             |                              |                                  |                             | C-GLU343 (OE1) [3.61] |                                    |
| Resveratrol | O-ARG280 (NE,NH2)<br>[3.30] | O-GLU259 (OE2) [3.04]        | H-HIS266 (CB) [3.70]             | C-LEU255 (CD1) [3.54]       | C-PHE264 (CD2) [3.52] | C-GLU259 (OE2) [3.90]              |
|             |                             | H-GLU259 (OE1,OE2)<br>[2.10] |                                  | C-ILE281 (CG1) [3.81]       | C-HIS266 (CB) [3.48]  | H-GLU259 (CD) [3.11]               |
|             |                             | O-ARG288 (CB) [3.48]         |                                  | C-CYS285 (SG) [3.66]        |                       | O- HIS266 (CB) [3.54]              |
|             |                             | H-ARG288 (CB) [3.05]         |                                  | C-ILE341 (CG2) [3.49]       |                       | C-ARG280 (CB,NE) [3.51]            |
|             |                             |                              |                                  | C-MET348 (CE) [3.09]        |                       | O-CYS285 (SG) [3.47]               |
|             |                             |                              |                                  |                             |                       | H-CYS285 (SG) [2.66]               |

|                         |                                                                         |  |                                                                                                                                   |                                                                                                                                                                                                                                |
|-------------------------|-------------------------------------------------------------------------|--|-----------------------------------------------------------------------------------------------------------------------------------|--------------------------------------------------------------------------------------------------------------------------------------------------------------------------------------------------------------------------------|
|                         |                                                                         |  |                                                                                                                                   | O-ILE341 (CG2) [3.60]<br>O-MET348 (CE,SD) [3.63]                                                                                                                                                                               |
| <i>p</i> -Coumaric acid | O-GLU259 (OE2) [3.00]<br>H-GLU259 (OE2) [2.18]<br>O-ARG280 (NH2) [3.46] |  | C-LEU255 (CD1,CD2) [3.50]<br>C-PHE264 (CB,CD2,CG) [3.48]<br>C-HIS266 (CB) [3.73]<br>C-ILE281 (CG1) [3.75]<br>C-MET348 (CE) [3.49] | O-LEU255 (CD1) [3.79]<br>H-LEU255 (CD1) [3.77]<br>H-GLU259 (CD,CG) [3.18]<br>H-ILE281 (CB,CG2) [3.24]<br>O-CYS285 (SG) [3.88]<br>H-CYS285 (SG) [3.84]<br>O-CYS285 (SG) [3.47]<br>O-ILE341 (CG2) [3.69]<br>O-MET348 (CE) [3.71] |

**Table S4 (cont).** Interactions of each phenolic compound with the specific amino acids of the PPAR $\gamma$  LBD, predicted by DockingServer (H for hydrogen, C for carbon and O for oxygen).

|               | Hydrogen bonds                | Polar                                                                  | Cation-pi | Hydrophobic                                  | pi-pi                     | Other                                                                                                                                                                                             |
|---------------|-------------------------------|------------------------------------------------------------------------|-----------|----------------------------------------------|---------------------------|---------------------------------------------------------------------------------------------------------------------------------------------------------------------------------------------------|
| Vanillic acid |                               | O-GLU418 (OE2) [3.07]<br>H-GLU418 (OE1,OE2) [2.11]                     |           | C-LEU421 (CB) [3.56]<br>C-PHE432 (CB) [3.20] |                           | O-GLU418 (CD, CG) [3.58]<br>O-LEU421 (CB) [3.81]<br>O-LYS422 (CE) [3.63]<br>H-SER428 (CB) [3.75]<br>O-LEU431 (CB) [3.21]<br>H-LEU431 (CB) [3.45]<br>H-GLU418 (CD) [3.10]<br>C-GLU418 (OE2) [3.76] |
| Myricetin     | O-LYS263 (CD,CE,CG,NZ) [3.07] | H-LYS263 (NZ) [2.64]<br>O-GLN345 (NE2) [3.40]<br>H-GLN345 (NE2) [3.19] |           | C-MET348 (CE) [3.60]                         | C-PHE264 (CD1,CE1) [3.46] | O-LEU255 (CD1) [3.82]<br>H-LEU255 (CD1,CD2) [2.88]<br>H-LYS263 (CD,CG) [3.49]<br>O-PHE264 (CD1,CE1,CG) [3.48]                                                                                     |



|               |                                                             |                                                                         |                                                       |                                                                             |                                                                                                                                                                         |
|---------------|-------------------------------------------------------------|-------------------------------------------------------------------------|-------------------------------------------------------|-----------------------------------------------------------------------------|-------------------------------------------------------------------------------------------------------------------------------------------------------------------------|
|               |                                                             |                                                                         |                                                       |                                                                             | H-CYS285 (SG) [3.67]<br>C-SER342 (CB) [3.19]<br>O-SER342 (CB) [3.29]<br>H-SER342 (CB) [2.73]<br>O-MET348 (CE) [3.68]                                                    |
| Gallic acid   |                                                             | O-GLU418 (OE2) [3.49]<br>H-GLU418 (OE2) [2.83]<br>O-GLN430 (NE2) [3.16] | H-PHE432 (CD2) [3.79]                                 | C-PHE432 (CB) [3.52]                                                        | O-GLU418 (CG) [3.63]<br>H-GLU418 (CD,CG) [3.72]<br>O-LEU421 (CB) [3.83]<br>H-SER428 (CB) [3.58]<br>O-LEU431 (CB) [3.23]<br>H-LEU431 (CB) [3.28]<br>O-PHE432 (CB) [3.44] |
| Ferullic acid | O-GLN286 (CD,NE2,OE1) [3.17]<br>O-TYR327 (CE1,CZ,OH) [3.05] | H-TYR327 (OH) [2.14]<br>O-HIS449 (NE2) [3.60]<br>H-HIS449 (NE2) [3.26]  | H-TYR327 (CE1,CZ) [2.99]<br>H-HIS449 (CD2,CE1) [3.68] | C-CYS285 (CB,SG) [3.69]<br>C-ILE326 (CG2) [3.71]<br>C-LEU330 (CB,CG) [3.56] | C-SER289 (CB) [3.84]<br>O-LEU330 (CD2,CG) [3.80]<br>H-LEU330 (CD2) [3.90]<br>H-LEU330 (CD1) [3.12]<br>O-PHE363 (CZ) [3.78]                                              |

**Table S4 (cont).** Interactions of each phenolic compound with the specific amino acids of the PPAR $\gamma$  LBD, predicted by DockingServer (H for hydrogen, C for carbon and O for oxygen).

|            | Hydrogen bonds           | Polar                                                                                                                                                                           | Cation-pi                 | Hydrophobic                                                                | pi-pi | Other                                                                                                                                                                                                                                                                                     |
|------------|--------------------------|---------------------------------------------------------------------------------------------------------------------------------------------------------------------------------|---------------------------|----------------------------------------------------------------------------|-------|-------------------------------------------------------------------------------------------------------------------------------------------------------------------------------------------------------------------------------------------------------------------------------------------|
| Naringin   | O-SER355 (OG) [2.96]     | O-GLU272 (OE1) [3.65]<br>H-GLU272 (OE1) [3.68]<br>O-GLU276 (OE1) [3.49]<br>H-GLU276 (OE1) [2.70]<br>H-SER355 (OG) [2.02]<br>O-ARG357 (NE) [3.84]<br>H-ARG357 (CZ,NE,NH2) [3.24] | H-PHE352 (CD1,CE1) [3.20] | C-MET252 (CG) [3.40]                                                       |       | H-ASP251 (CB) [3.36]<br>O-ASP251 (CB) [3.77]<br>C-GLU272 (OE1,OE2) [3.43]<br>H-GLU276 (CD) [3.65]<br>C-GLU276 (OE1) [3.17]<br>O-PHE352 (CD1,CE1) [3.19]<br>H-SER355 (CB) [3.21]<br>C-SER355 (OG) [3.13]<br>C-ARG357 (CB, CG) [3.60]<br>C-LYS358 (CD,CE,CG) [3.62]<br>O-LYS358 (CD) [3.38] |
| Hesperidin | O-ASN412 (CB,ND2) [3.43] | ARG357 (CZ, NE, NH2)                                                                                                                                                            |                           | C-LEU309 (CD2) [3.88]<br>C-PRO405 (CB) [3.18]<br>C-ILE409 (CD1,CG1) [3.18] |       | O-ASN308 (CB) [3.34]<br>H-ASN308 (CB) [3.24]<br>O-LEU309 (CD2) [3.54]<br>O-PRO405 (CB) [3.88]<br>C-ASP408 (CB) [3.68]<br>H-ASN412 (CB,CG) [3.37]<br>C-ASN412 (ND2) [3.79]                                                                                                                 |

Supplementary Figures

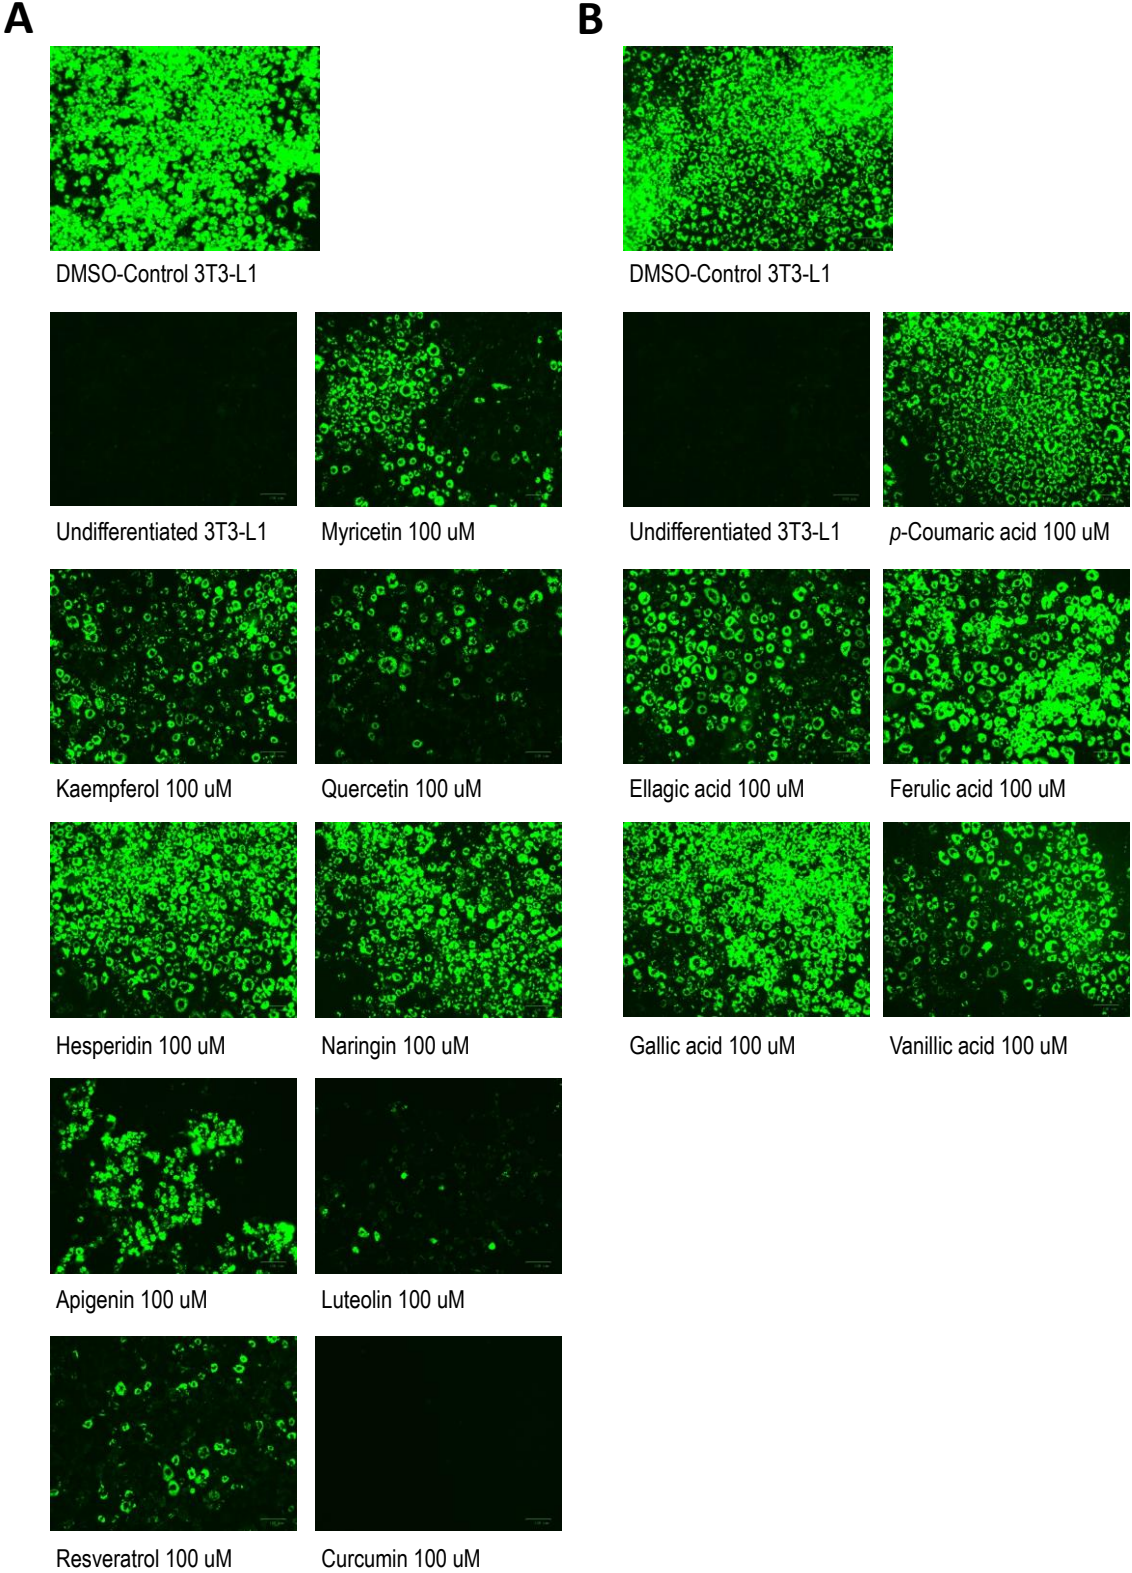

**Figure S1.** Images obtained from observation under a fluorescence microscope of the effect of the different treatments in 3T3-L1 after Nile Red staining. The figure corresponds to the effect of the treatments at the dose of 100 uM and the S1 test. A) Triglyceride content of 3T3-L1 adipocytes after

treatment with polyphenols. B) Triglyceride content of 3T3-L1 adipocytes after treatment with phenolic acids.

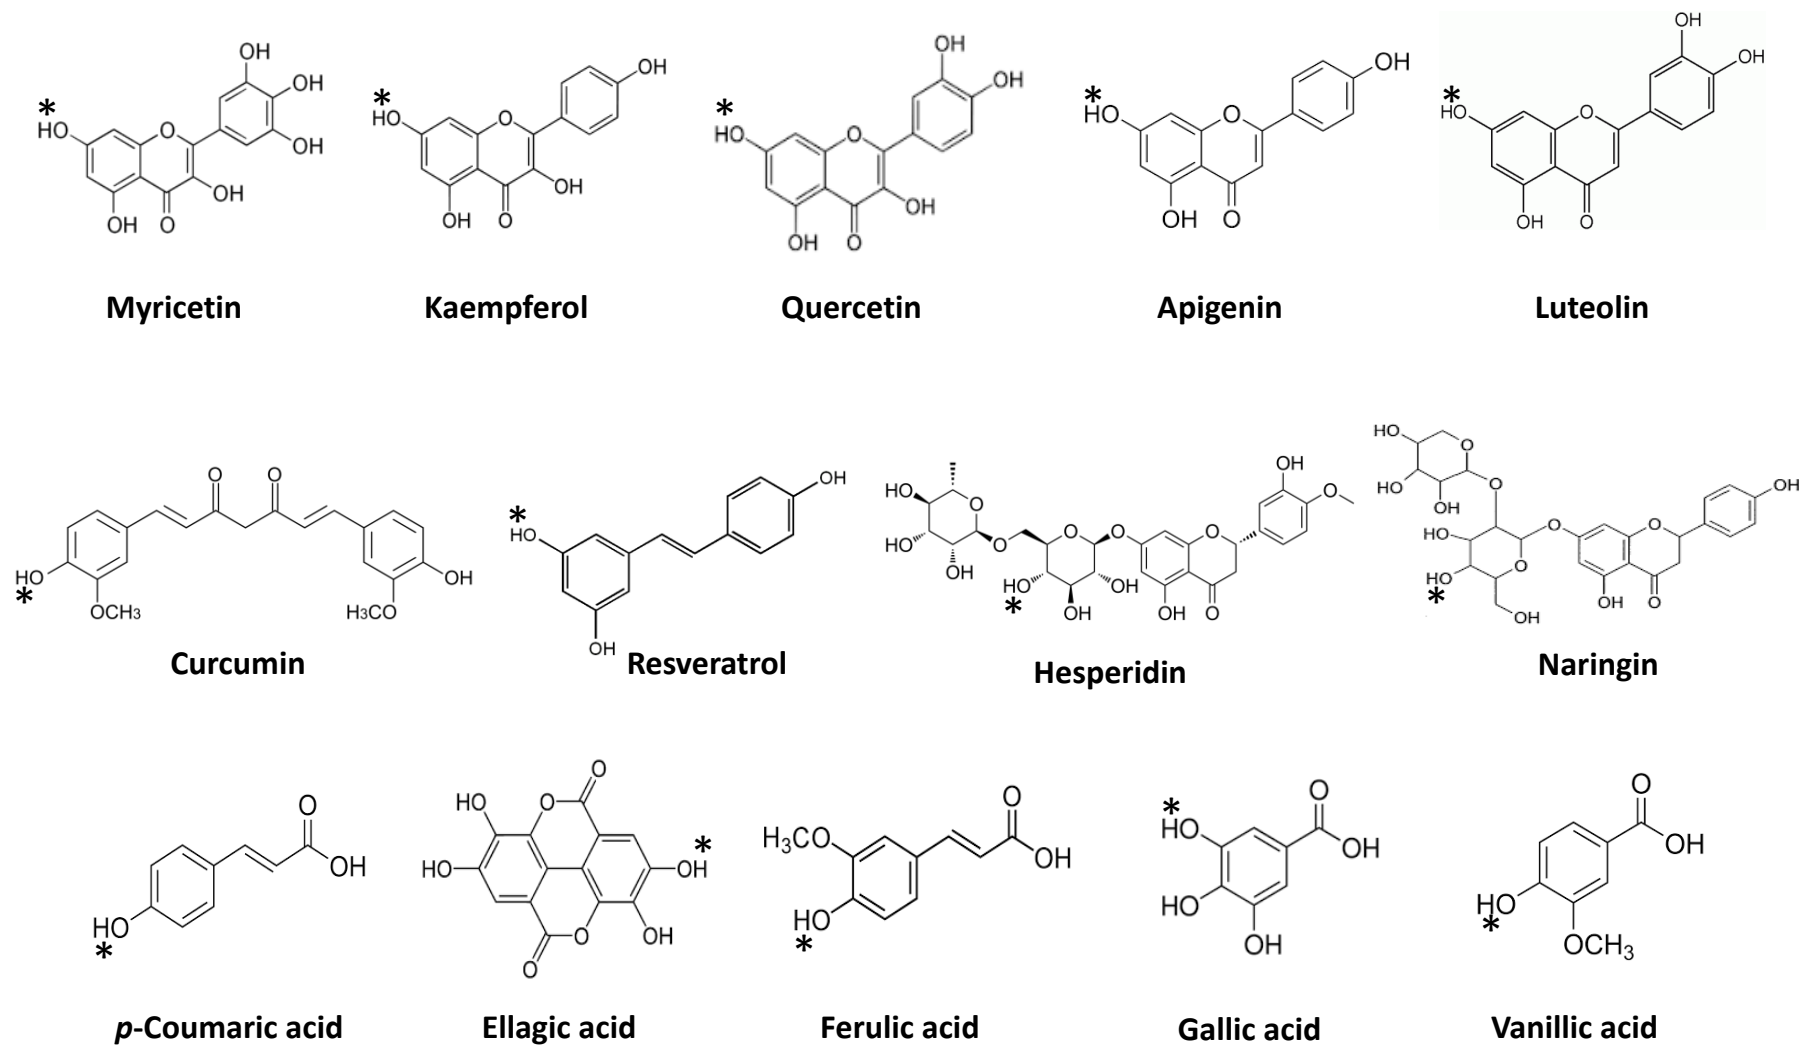

**Figure S2.** Structures of the phenolic compounds evaluated in this study. The hydrogens indicated with the symbol \* are involved in the interactions with the

LBD of PPAR $\gamma$ .
